# Supplementary material
Source: PubMed Central journal article supplement (PMC9832811)
Supplement: 12888_2022_4438_MOESM7_ESM.pdf [file 12888_2022_4438_MOESM7_ESM.pdf]

Table S2. Credit taxonomy for author contributions.

| <b>Term</b>                   | <b>Description</b>                                                                                                                                | <b>Authors</b>                            |
|-------------------------------|---------------------------------------------------------------------------------------------------------------------------------------------------|-------------------------------------------|
| Conceptualization             | <a href="https://credit.niso.org/contributor-roles/conceptualization/">https://credit.niso.org/contributor-roles/conceptualization/</a>           | All authors                               |
| Data curation                 | <a href="https://credit.niso.org/contributor-roles/data-curation/">https://credit.niso.org/contributor-roles/data-curation/</a>                   | HR, WB, JB, KW on behalf of Grampian DaSH |
| Formal analysis               | <a href="https://credit.niso.org/contributor-roles/formal-analysis/">https://credit.niso.org/contributor-roles/formal-analysis/</a>               | WB, JB                                    |
| Funding acquisition           | <a href="https://credit.niso.org/contributor-roles/funding-acquisition/">https://credit.niso.org/contributor-roles/funding-acquisition/</a>       | JB, CB, SG, KW                            |
| Investigation                 | <a href="https://credit.niso.org/contributor-roles/investigation/">https://credit.niso.org/contributor-roles/investigation/</a>                   | WB, JB                                    |
| Methodology                   | <a href="https://credit.niso.org/contributor-roles/methodology/">https://credit.niso.org/contributor-roles/methodology/</a>                       | WB, JB, CB, SP,                           |
| Project administration        | <a href="https://credit.niso.org/contributor-roles/project-administration/">https://credit.niso.org/contributor-roles/project-administration/</a> | JB, CB, SP, KW                            |
| Resources                     | <a href="https://credit.niso.org/contributor-roles/resources/">https://credit.niso.org/contributor-roles/resources/</a>                           | DR, ET, KW, HR                            |
| Software                      | <a href="https://credit.niso.org/contributor-roles/software/">https://credit.niso.org/contributor-roles/software/</a>                             | WB, JB                                    |
| Supervision                   | <a href="https://credit.niso.org/contributor-roles/supervision/">https://credit.niso.org/contributor-roles/supervision/</a>                       | JB, CB, SP                                |
| Validation                    | <a href="https://credit.niso.org/contributor-roles/validation/">https://credit.niso.org/contributor-roles/validation/</a>                         | JB, WB                                    |
| Visualization                 | <a href="https://credit.niso.org/contributor-roles/visualization/">https://credit.niso.org/contributor-roles/visualization/</a>                   | WB, JB                                    |
| Writing – original draft      | <a href="https://credit.niso.org/contributor-roles/writing-original-draft/">https://credit.niso.org/contributor-roles/writing-original-draft/</a> | WB                                        |
| Writing – review & editing    | <a href="https://credit.niso.org/contributor-roles/writing-review-editing/">https://credit.niso.org/contributor-roles/writing-review-editing/</a> | All authors                               |
| Patient and Public Engagement |                                                                                                                                                   | MR, SG, BO, WB, JB                        |
