# Supplementary material
Source: PubMed Central journal article supplement (PMC9832811)
Supplement: 12888_2022_4438_MOESM8_ESM.pdf [file 12888_2022_4438_MOESM8_ESM.pdf]

Table S3. List of mental health medications by British National Formulary Section and Subsection

| <b>BNF Section Code</b> | <b>Section Name</b>                           | <b>BNF Subsection Code</b> | <b>Subsection Name</b>                          | <b>Approved Name</b>                                                                                                                                                                                             |
|-------------------------|-----------------------------------------------|----------------------------|-------------------------------------------------|------------------------------------------------------------------------------------------------------------------------------------------------------------------------------------------------------------------|
| 401                     | Hypnotics and Anxiolytics                     | 40101                      | <i>Hypnotics</i>                                | Melatonin<br>Zopiclone<br>Temazepam<br>Nitrazepam<br>Zolpidem<br>Chloral Hydrate<br>Cloral Betaine<br>Sodium Oxybate                                                                                             |
|                         |                                               | 40102                      | <i>Anxiolytics</i>                              | Diazepam<br>Lorazepam<br>Buspirone Hydrochloride                                                                                                                                                                 |
| 402                     | Drugs used in psychoses and related disorders | 40201                      | <i>Antipsychotic drugs</i>                      | Olanzapine<br>Risperidone<br>Aripiprazole<br>Chlorpromazine Hydrochloride<br>Quetiapine<br>Haloperidol<br>Sulpiride<br>Levomepromazine<br>Trifluoperazine<br>Promazine Hydrochloride<br>Lurasidone Hydrochloride |
|                         |                                               | 40202                      | <i>Antipsychotic depot injections</i>           | Aripiprazole                                                                                                                                                                                                     |
|                         |                                               | 40203                      | <i>Drugs used for mania and hypomania</i>       | Lithium Carbonate<br>Sodium Valproate                                                                                                                                                                            |
|                         |                                               | 403                        | Antidepressant drugs                            | 40301                                                                                                                                                                                                            |
|                         |                                               | 40302                      | <i>Monoamine-oxidase inhibitors</i>             | Phenelzine                                                                                                                                                                                                       |
|                         |                                               | 40303                      | <i>Selective serotonin re-uptake inhibitors</i> | Sertraline<br>Fluoxetine<br>Citalopram<br>Escitalopram<br>Fluvoxamine Maleate<br>Paroxetine                                                                                                                      |
|                         |                                               | 40304                      | <i>Other antidepressant drugs</i>               | Mirtazapine<br>Duloxetine<br>Flupentixol<br>Venlafaxine<br>Agomelatine<br>Vortioxetine Hydrobromide                                                                                                              |
| 404                     | CNS Stimulants and drugs used for ADHD        | 40400                      | <i>CNS Stimulants and drugs used for ADHD</i>   | Methylphenidate Hydrochloride<br>Atomoxetine<br>Lisdexamfetamine Dimesylate<br>Dexamfetamine Sulfate<br>Modafinil<br>Guanfacine Hydrochloride                                                                    |
| 410                     | Drugs used in substance dependence            | 41001                      | <i>Alcohol dependence</i>                       | Acamprosate Calcium                                                                                                                                                                                              |
|                         |                                               | 41002                      | <i>Nicotine dependence</i>                      | Nicotine<br>Varenicline Tartrate                                                                                                                                                                                 |
|                         |                                               | 41003                      | <i>Opioid dependence</i>                        | Methadone Hydrochloride<br>Buprenorphine And Naloxone                                                                                                                                                            |
